1 Manuscript

2 *Journal of Experimental Biology*

3

4

5

6 **Effect of channel assembly (KCNQ1 or KCNQ1 + KCNE1) on the response of**  
7 **zebrafish  $I_{Ks}$  to  $I_{Ks}$  inhibitors and activators**

8

9 Jaakko Haverinen\*, Minna Hassinen and Matti Vornanen

10 Department of Environmental and Biological Sciences, University of Eastern Finland, FINLAND

11

12

13

14

15

16

17

18

19

20

21

22 **Correspondence:**

23 Jaakko Haverinen

24 University of Eastern Finland

25 Department of Environmental and Biological Sciences

26 P.O. Box 111, 80101 Joensuu, FINLAND

27 [jaakko.haverinen@uef.fi](mailto:jaakko.haverinen@uef.fi)

28

29 **ABSTRACT**

30 In cardiac myocytes, the slow component of the delayed rectifier  $K^+$  current ( $I_{Ks}$ ) ensures repolarization  
31 of action potential during beta-adrenergic activation or when other repolarizing  $K^+$  currents fail. As a  
32 key factor of cardiac repolarization  $I_{Ks}$  should be present in model species used for cardiovascular drug  
33 screening, preferably with pharmacological characteristics similar to those of the human  $I_{Ks}$ . To this  
34 end, we investigated the effects of inhibitors and activators of the  $I_{Ks}$  on KCNQ1 and KCNQ1+KCNE1  
35 channels of the zebrafish, an important model species, in Chinese hamster ovary cells. Inhibitors of  $I_{Ks}$ ,  
36 chromanol 293B and HMR-1556, inhibited zebrafish  $I_{Ks}$  channels with approximately similar potency as  
37 that of mammalian  $I_{Ks}$ . Chromanol 293B concentration for half-maximal inhibition ( $IC_{50}$ ) of zebrafish  $I_{Ks}$   
38 was at  $13.1 \pm 5.8$  and  $13.4 \pm 2.8$   $\mu M$  for KCNQ1 and KCNQ1+KCNE1 channels, respectively. HMR-1556  
39 was a more potent inhibitor of zebrafish  $I_{Ks}$  with  $IC_{50} = 0.1 \pm 0.1$   $\mu M$  and  $1.5 \pm 0.8$   $\mu M$  for KCNQ1 and  
40 KCNQ1+KCNE1 channels, respectively. R-L3 and mefenamic acid, generally identified as  $I_{Ks}$  activators,  
41 both inhibited zebrafish  $I_{Ks}$ . R-L3 almost completely inhibited zebrafish  $I_{Ks}$  generated by KCNQ1 and  
42 KCNQ1+KCNE1 channels with similar affinity ( $IC_{50}$   $1.1 \pm 0.4$  and  $1.0 \pm 0.4$   $\mu M$ , respectively). Mefenamic  
43 acid partially blocked zebrafish KCNQ1 ( $IC_{50} = 9.5 \pm 4.8$   $\mu M$ ) and completely blocked KCNQ1+KCNE1  
44 channels ( $IC_{50} = 3.3 \pm 1.8$   $\mu M$ ). Although zebrafish  $I_{Ks}$  responds to  $I_{Ks}$  inhibitors in the same way as  
45 mammalian  $I_{Ks}$ , its response to activators is atypical, probably due to the differences in the binding  
46 domain of KCNE1 to KCNQ1. Therefore, care must be taken when translating the results from zebrafish  
47 to humans.

48

49 Key words: drug screening, translational model, chromanol-293B, HMR-1556, R-L3, mefenamic acid

50

## 51 INTRODUCTION

52 The zebrafish (*Danio rerio*) is an established animal model in developmental biology, genetics and  
53 several other disciplines because of its research technical, economical, and ethical benefits (Kari et al.,  
54 2007; Verkerk and Remme, 2012; Vornanen et al., 2018; Narumanchi et al., 2021). For the same  
55 reasons, zebrafish has been sometimes considered as the optimal animal model for preclinical drug  
56 screening (Parnig et al., 2002; MacRae and Peterson, 2015; de la Cruz et al., 2020). The primary goal of  
57 the preclinical drug screening “is to determine if the product is reasonably safe for initial use in  
58 humans, and if the compound exhibits pharmacological activity that justifies commercial  
59 development” (U.S. Food and Drug Administration, Investigational New Drug (IND) Application). In  
60 order to obtain significant results from preclinical studies with high generalizability, appropriate animal  
61 models that are as comparable as possible to the target human population are required (Honek, 2017).  
62 The requirements for preclinical drug screening are much more stringent than for basic science (Wall  
63 and Shani, 2008). It is not enough that humans and model species share common principles of gene  
64 function and regulation, the binding affinity of a drug and its effect on targets should also be  
65 quantitatively similar in humans and model species (Wall and Shani, 2008; Pound and Ritskes-Hoitinga,  
66 2018). If those requirements are not met, it is possible that useful molecules - which appear toxic in  
67 model species - might be rejected from the drug development pipeline as false positives, or conversely,  
68 toxic compounds to humans, but not to the model animal, might proceed to clinical drug development  
69 program (Wall and Shani, 2008). Therefore, species selection should be based on what gives the best  
70 and safest platform for human testing (Honek, 2017). In cardiac electrophysiology, the zebrafish is in  
71 some respects a better model than the mouse. Unlike the mouse ventricular action potential (AP), the  
72 zebrafish ventricular AP has a clear plateau phase, and the heart rate of the zebrafish is more  
73 reminiscent of the human heartbeat (Brette et al., 2008; Nemtsas et al., 2010). In addition,  
74 repolarization of zebrafish and human cardiac AP is largely based on the fast ( $I_{Kr}$ ) and slow components  
75 ( $I_{Ks}$ ) of the delayed rectifier  $K^+$  current rather than transient outward current ( $I_{to}$ ) and ultra-rapid  $K^+$   
76 current ( $I_{Kur}$ ) typical of the murine heart (Xu et al., 1999; Verkerk and Remme, 2012; Vornanen and  
77 Hassinen, 2016; Joukar, 2021). Despite those similarities in ion current composition, drug responses of  
78 the zebrafish ion channels are still poorly understood. Because the pharmacological properties of the  
79 zebrafish  $I_{Ks}$  have not been earlier examined, we decided to characterize the responses of zebrafish  $I_{Ks}$   
80 channels to identified inhibitors and activators of the  $I_{Ks}$ .

81 In addition to  $I_{Kr}$ ,  $I_{Ks}$  is the main regulator of ventricular AP duration and thus QT time in the  
82 electrocardiogram. Under normal circumstances,  $I_{Ks}$  plays little role in ventricular AP repolarization  
83 (Bendahhou et al., 2005; Bett et al., 2006). However, when ventricular repolarization faces challenging  
84 situations, notably under stressful conditions of increased sympathetic tone,  $I_{Ks}$  contribution is  
85 markedly increased at high heart rates (Rocchetti et al., 2001; Jost et al., 2005). Thus, under vulnerable

86 conditions,  $I_{Ks}$  provides a repolarization reserve that can prevent excessive AP prolongation and  
87 development of arrhythmogenic afterdepolarizations, especially when the other repolarizing current  
88  $I_{Kr}$  is compromised (Chen et al., 2003; Bendahhou et al., 2005; Bett et al., 2006). In mammalian hearts,  
89  $I_{Ks}$  is generated by a channel assembly consisting of the KCNQ1 alpha subunits and KCNE1 (MinK) beta  
90 subunits, although the exact stoichiometry of the subunits is disputed (Sanguinetti et al., 1996;  
91 Barhanin et al., 1996; Chen et al., 2003; Morin and Kobertz, 2008; Wang et al., 2011). Expression of  
92 KCNQ1 alone generates a rapidly activating and inactivating delayed-rectifier  $K^+$  current, whose  
93 properties do not match with those of the native cardiac  $I_{Ks}$ . Assembly of KCNQ1 with KCNE1  
94 profoundly modifies the biophysical characteristics of KCNQ1 including activation and deactivation  
95 kinetics, frequency-response and beta-adrenergic responsiveness. In particular, the presence of KCNE1  
96 in the channel assembly affects drug binding of the channel (Bett and Rasmusson, 2008).

97         Given that preclinical screening of cardiovascular drugs requires detailed information on the  
98 used biological targets, it is astonishing how little attention has been paid to the comparison of human  
99 and zebrafish cardiac ion currents/channels, the main targets of arrhythmia medicines. Understanding  
100 the molecular basis of subunit–channel interactions and their impact on drug responses is therefore  
101 of critical importance when model organisms are used for preclinical drug screening. While it is known  
102 that gating kinetics and pharmacological interactions of  $I_{Ks}$  channel is strongly affected by the presence  
103 of the KCNE1 beta subunit (Barhanin et al., 1996; Bett et al., 2006; Lerche et al., 2007; Bett and  
104 Rasmusson, 2008; Hassinen et al., 2011), the effect of channel assembly on drug responses in zebrafish  
105 has not been studied. We recently indicated that  $I_{Ks}$  is present in zebrafish ventricular myocytes and it  
106 affects the duration of ventricular AP (Abramochkin et al., 2018). Notably, transcripts of the KCNQ1  
107 are expressed at much higher levels than those of KCNE1, and electrophysiological properties of the  
108 ventricular  $I_{Ks}$  suggest that many of the channels might be homotetrameric KCNQ1 channels.  
109 Therefore, we decided to examine how the subunit composition of the zebrafish  $I_{Ks}$  channel affects the  
110 currents response to identified  $I_{Ks}$  inhibitors and activators. To this end, we expressed zebrafish KCNQ1  
111 and KCNQ1+KCNE1 channels in CHO cells and examined their responses to known activators and  
112 inhibitors of the mammalian  $I_{Ks}$ . Because subunit composition of the zebrafish  $I_{Ks}$  channel may contain  
113 fewer KCNE1 subunits than the mammalian  $I_{Ks}$  channel, it was hypothesized that drug responses, in  
114 which stoichiometry of subunits is crucial, would differ between mammalian and zebrafish  $I_{Ks}$ .

115

## 116 **MATERIALS AND METHODS**

### 117 ***Heterologous gene expression***

118 Zebrafish KCNQ1 and KCNE1, previously cloned to pcDNA3.1 vector (Abramochkin et al., 2018), were  
119 expressed in Chinese hamster ovary (CHO) cells. CHO cells were grown in Ham's F12 nutrient mixture  
120 (Sigma-Aldrich) supplemented with 10% heat-inactivated fetal bovine serum (Sigma-Aldrich) and 100

121 U ml<sup>-1</sup> penicillin-streptomycin (Thermo Scientific) at +37°C under 7.5% CO<sub>2</sub> atmosphere. For transient  
122 expression of KCNQ1 and KCNE1, cells were transfected with plasmids containing either KCNQ1 alone  
123 or KCNQ1:KCNE1 in ratio 3:1 using Turbofect transfection reagent (Thermo Scientific) (Hassinen et al.,  
124 2015; Abramochkin et al., 2018). Green fluorescent protein (GFP)-coding plasmid peGFP-N1 was used  
125 to see the transfection status of the cells.

126

### 127 **Whole-cell patch-clamp**

128 Whole cell patch-clamp experiments were conducted 48–56 h after transfection. The slow component  
129 of the delayed rectifier K<sup>+</sup> current (*I*<sub>KS</sub>) was recorded at 28 °C as previously reported in detail (Hassinen  
130 et al., 2011; Abramochkin et al., 2018). Cells were superfused with a saline solution containing (in mmol  
131 l<sup>-1</sup>): 150 NaCl, 3 KCl, 1.8 CaCl<sub>2</sub>, 1.2 MgCl<sub>2</sub>, 10 HEPES and 10 glucose, with pH adjusted to 7.7 at 20 °C  
132 with NaOH. Patch pipettes were filled with K<sup>+</sup>-based electrode solution containing (in mmol l<sup>-1</sup>): 140  
133 KCl, 4 MgATP, 1 MgCl<sub>2</sub>, 5 EGTA, 0.3 Na<sub>2</sub>GTP, and 10 HEPES with pH adjusted to 7.2 at 20 °C with KOH.  
134 For current-voltage dependence, *I*<sub>KS</sub> was elicited from the holding potential of -80 mV by 5-s  
135 depolarizing pulses to -40 to +80 mV in 20-mV steps. To generate concentration-response curves, cells  
136 were exposed to cumulatively increasing concentrations of *I*<sub>KS</sub> current inhibitors and activators for 5  
137 minutes during which time a steady-state response was obtained.

138

### 139 **Drugs**

140 Two *I*<sub>KS</sub> inhibitors, chromanol 293B (*trans-N*-[6-Cyano-3,4-dihydro-3-hydroxy-2,2-dimethyl-2*H*-1-  
141 benzopyran-4-yl]-*N*-methyl-ethanesulfonamide) and HMR-1556 (*N*-[(3*R*,4*S*)-3,4-Dihydro-3-hydroxy-  
142 2,2-dimethyl-6-(4,4,4-trifluorobutoxy)-2*H*-1-benzopyran-4-yl]-*N*-methylmetanesulfonamide) and two  
143 *I*<sub>KS</sub> activators, L-364,373 (R-L3 or 5-(2-Fluorophenyl)-1,3-dihydro-3-(1*H*-indol-3-ylmethyl)-1-methyl-2*H*-  
144 1,4-benzodiazepin-2-one) (Tocris Cookson; Bristol, UK) and mefenamic (dimethylphenylaminobenzoic  
145 acid (Sigma-Aldrich) were used. Stock solutions of all drugs were made in DMSO at concentrations of  
146 30 mM, 1mM, 1mM, 30mM for chromanol 293B, HMR-1556, R-L3 and mefenamic acid, respectively.  
147 Working solutions were made daily in the external saline from these stock solutions.

148

### 149 **Data analysis and Statistics**

150 The results are presented as means ± SEM from *n* cells. For the concentration-response analysis the  
151 normalized *I*<sub>KS</sub> current was plotted as a function of drug concentration and fitted to the sigmoidal  
152 equation

153

$$I = (B_{max} \times x) / (IC_{50} + x)$$

154 where *I* is current, *B*<sub>max</sub> maximum inhibition of the current, *IC*<sub>50</sub> concentration of the drug which causes  
155 half-maximal inhibition of the current and *x* is the drug concentration. Statistical analysis was

156 performed with SPSS 27.0 software (IBM). After testing the normal distribution of the data, non-paired  
157 *t*-test was used to compare current densities and IC<sub>50</sub> values between KCNQ1 and KCNQ1+KCNE1  
158 channels. A *p* value < 0.05 was considered statistical significantly different.

160

## 159 RESULTS

### 161 *Properties of the current generated by homomeric KCNQ1 and heteromeric KCNQ1+KCNE1 channels*

162 There was marked differences in amplitude and kinetics of outward currents generated by homomeric  
163 KCNQ1 and heteromeric KCNQ1+KCNE1 channels. At the end of the 5-s depolarizing pulse, the density  
164 of the current produced by homomeric KCNQ1  $\alpha$ -subunits was about 6 times lower ( $23.0 \pm 6.6$  pA pF<sup>-1</sup>)  
165 than that of KCNQ1+KCNE1 heteromeric channels ( $142 \pm 37.7$  pA pF<sup>-1</sup>) ( $p < 0.05$ ) (**Figure 1A-C**). In  
166 addition, the activation kinetics of KCNQ1 channels were much faster with a peak current at  $18.1 \pm 1.8$   
167 ms, followed by a slower inactivation to the steady-state level. KCNQ1+KCNE1 channels activated much  
168 more slowly with an activation time constant ( $\tau$ ) of  $33.7 \pm 7.3$  ms and showed no inactivation during  
169 depolarization. The density of the early peak of KCNQ1 current was  $37.3 \pm 6.7$  pA pF<sup>-1</sup>, which is 62%  
170 larger than the steady-state current at the end of the depolarizing pulse. Cells transfected with GFP  
171 plastids had virtually no current when perfused with vehicle-only saline (DMSO) (**Figure 1C**).

172

### 173 *Effects of I<sub>Ks</sub> inhibitors on homomeric KCNQ1 and heteromeric KCNQ1+KCNE1 channels*

174 Chromanol 293B and its derivative HMR-1556 are blockers of the mammalian slow delayed rectifier K<sup>+</sup>  
175 channels. Chromanol 293B inhibited the zebrafish I<sub>Ks</sub> current in concentration-dependent manner  
176 (**Figure 2A**). The chromanol 293B concentration for half-maximal inhibition (IC<sub>50</sub>) was  $13.1 \pm 5.8$   $\mu$ M  
177 and  $13.4 \pm 2.8$   $\mu$ M for KCNQ1 and KCNQ1+KCNE1 channels, respectively ( $p > 0.05$ ). Complete inhibition  
178 was attained at 300  $\mu$ M chromanol 293B for both channel types. HMR-1556 inhibited I<sub>Ks</sub> with a much  
179 higher affinity than chromanol 293B (**Figure 2B**) with IC<sub>50</sub>-values of  $0.1 \pm 0.1$   $\mu$ M and  $1.5 \pm 0.8$   $\mu$ M for  
180 KCNQ1 and KCNQ1+KCNE1 channel compositions, respectively. This difference between channel  
181 assemblies is statistically significant ( $p = 0.01$ ). At the concentration of 100  $\mu$ M, HMR-1556 completely  
182 inhibited both currents.

183

### 184 *Effects of I<sub>Ks</sub> activators on homomeric KCNQ1 and heteromeric KCNQ1+KCNE1 channels*

185 R-L3 and mefenamic acid are identified as activators of the mammalian I<sub>Ks</sub> (Salata et al., 1998; Abitbol  
186 et al., 1999; Xu, X. et al., 2002; Wang et al. 2020b). Surprisingly, R-L3 inhibited the zebrafish I<sub>Ks</sub> at all  
187 tested drug concentrations regardless of the type of the channel assembly (**Figure 3A**). R-L3 inhibited  
188 I<sub>Ks</sub> generated by KCNQ1 and KCNQ1+KCNE1 channels with similar affinity (IC<sub>50</sub>  $1.1 \pm 0.4$   $\mu$ M and  $1.0 \pm$   
189  $0.4$   $\mu$ M, respectively) ( $p > 0.05$ ). At the concentration of 10  $\mu$ M R-L3 almost completely inhibited I<sub>Ks</sub> of  
190 both channel types. At low concentrations (0.001 and 0.01  $\mu$ M), mefenamic acid slightly stimulated

191 the current generated by the homomeric KCNQ1 channels, while higher concentrations (1-100  $\mu\text{M}$ )  
192 inhibited the current (**Figure 3B**). However, mefenamic acid maximally inhibited only about 40% of the  
193 current produced by KCNQ1 channels. The current generated by the heteromeric KCNQ1+KCNE1  
194 channels was monotonically and completely inhibited by mefenamic acid (**Figure 3B**). The mefenamic  
195 acid concentration for half-maximal inhibition was  $9.5 \pm 4.8 \mu\text{M}$  and  $3.3 \pm 1.8 \mu\text{M}$  for KCNQ1 and  
196 KCNQ1+KCNE1 channels, respectively ( $p>0.05$ ).

197

## 198 **DISCUSSION**

199 The present results show that inhibitors of  $I_{Ks}$ , chromanol 293B and HMR-1556, inhibit zebrafish  $I_{Ks}$  with  
200 a similar potency as they inhibit mammalian  $I_{Ks}$  (**Table 1**). In contrast, it was surprising that R-L3 and  
201 mefenamic acid, which are identified as activators of mammalian  $I_{Ks}$ , inhibited the currents generated  
202 by the zebrafish KCNQ1 and KCNQ1+KCNE1 channels. Thus, in some respects, the response of the  
203 zebrafish  $I_{Ks}$  to drugs was similar to that of mammalian  $I_{Ks}$ , but in some other respects, responses of  
204 zebrafish and mammalian  $I_{Ks}$  were completely opposite. Also, the channel assembly affected drug  
205 responses of zebrafish  $I_{Ks}$ . Homotetrameric KCNQ1 and KCNQ1+KCNE1 channels were differently by  
206 two  $I_{Ks}$ -modifying drugs, HMR-1556 and mefenamic acid. This is not surprising given that the assembly  
207 KCNE1 with KCNQ1 is known to significantly modulate drug responses of  $I_{Ks}$  (Wang et al. 2020a).

208

### 209 *General properties of zebrafish KCNQ1 and KCNQ1+KCNE1 currents*

210 The activation kinetics of the  $I_{Ks}$  current and the transcript levels of the KCNQ1 and KCNE1 subunits in  
211 the zebrafish ventricle suggest that the  $I_{Ks}$  current is probably produced by channel assemblies  
212 consisting of a mixture of KCNQ1 homotetramers and KCNQ1+KCNE1 assemblies (3:1) (Abramochkin  
213 et al., 2018). Therefore, drug responses of the homotetrameric KCNQ1 channels and the channel  
214 assemblies produced by transfection of CHO cells with KCNQ1 and KCNE1 plasmids in 3:1 ratio were  
215 examined. The properties of the native ventricular  $I_{Ks}$  should be intermediate to those described here  
216 for KCNQ1 and KCNQ1+KCNE1 channels in CHO cells. Consistent with the known effects of KCNE1 on  
217 the activation kinetics of the  $I_{Ks}$  (Barhanin et al., 1996; Sanguinetti et al., 1996), the current generated  
218 by homotetrameric KCNQ1 channels was much faster than that generated by KCNQ1+KCNE1 channel  
219 assemblies. The KCNQ1 homotetrameric channels produced a prominent early component that  
220 inactivated to a steady level during the 5 second depolarizing pulse (Abramochkin et al., 2018). The  
221 voltage-dependence of  $I_{Ks}$  activation was slightly shifted to more negative voltages, as expected for the  
222 heteromeric KCNQ1+KCNE1 channels (Barhanin et al., 1996; Sanguinetti et al., 1996).

223

### 224 *Responses to $I_{Ks}$ blockers*

225 Chromanol 293B and its derivative HMR-1556 are established blockers of the  $I_{Ks}$  channels. Indeed, both  
226 drugs inhibited the zebrafish  $I_{Ks}$  so that approximately 80% of the current was blocked at the  
227 concentration of 300 and 100  $\mu$ M for chromanol 293B and HMR-1556, respectively. The  $IC_{50}$ -values of  
228 the zebrafish channels to chromanol 293B and HMR-1556 were similar as previously reported for the  
229 respective mammalian channels. Like the mammalian cardiac  $I_{Ks}$ , the affinity of HMR-1556 for the  
230 zebrafish  $I_{Ks}$  channel is almost two orders of magnitude higher than that of chromanol 293B (**Table 1**).  
231 The high similarity of chromanol 293B and HMR-1556 affinities towards zebrafish and mammalian  $I_{Ks}$   
232 channels is not unexpected considering the high overall sequence similarity of their KCNQ1 proteins  
233 (68.3%), the binding target of chromanols. The chromanol receptor lies in the inner pore vestibule of  
234 the KCNQ1 channel with binding sites in the pore loop (H5) and the S6 transmembrane domain of the  
235 protein. Threonine-312, isoleucine-337 and phenylalanine-340 of the KCNQ1 are the critical bindings  
236 sites for chromanol 293B (Lerche et al., 2007). The same amino acid residues exist in the zebrafish  
237 KCNQ1 suggesting that the chromanol 293B binding affinity should be similar for zebrafish and human  
238 channels (Hassinen et al., 2011; Abramochkin et al., 2018). In fact, the H5 loop and the S6 domain are  
239 identical in human and zebrafish KCNQ1 except for the position 324 (isoleucine vs. valine).

240 Interaction of KCNE1 beta subunit with KCNQ1 alpha subunit is known to increase the inhibition  
241 potency of chromanol 293B in mammalian  $I_{Ks}$  channels (Busch et al., 1997; Bett et al., 2006; Lerche et  
242 al., 2007). For example, in human and mouse, KCNQ1+KCNE1 channels are 4-6 times more sensitive to  
243 chromanol 293B than KCNQ1 channels (**Table 1**). It was therefore surprising to find that the chromanol  
244 293B sensitivity of zebrafish  $I_{Ks}$  channels was independent of the channel composition; the  $IC_{50}$ -values  
245 of KCNQ1 and KCNQ1+KCNE1 were almost identical. In addition, zebrafish KCNQ1 channels were 15  
246 times more sensitive to HMR-1556 than KCNQ1+KCNE1 channels, as if KCNE1 inhibited HMR-1556  
247 binding to KCNQ1. Because the chromanol binding site of KCNQ1 appears to be identical in mammalian  
248 and fish channels, different responses of zebrafish KCNQ1+KCNE1 channels (no enhancement of  
249 chromanol 293B block by KCNE1; reduction of HMR-1556 block by KCNE1) compared to the  
250 corresponding mammalian channels are likely to be in different effect of KCNE1 on KCNQ1 in the  
251 zebrafish channel. This would not be surprising given the small sequence similarity (46.7%) between  
252 human and zebrafish KCNE1.

253

#### 254 *Responses to $I_{Ks}$ activators*

255 Contrary to expectations, R-L3, an agonists of the mammalian  $I_{Ks}$  current (Salata et al., 1998; Xu, X. et  
256 al., 2002; Seebohm et al., 2003), inhibited the zebrafish  $I_{Ks}$ . However, it is important to note that the  
257 effect of R-L3 on the mammalian  $I_{Ks}$  current is complex. First, R-L3 is a partial agonist and has a biphasic  
258 effect on the mammalian  $I_{Ks}$ . At low concentrations (0.03-1.0  $\mu$ M) it activates  $I_{Ks}$  and at high  
259 concentrations (10  $\mu$ M) it inhibits  $I_{Ks}$  (Salata et al., 1998). Second, the effect of R-L3 is stereospecific,



260 the d-enantiomer activates  $I_{Ks}$  and the l-enantiomer inhibits  $I_{Ks}$  (Salata et al., 1998; Corici et al., 2013).  
261 Third, association of KCNQ1 with KCNE1 subunits prevents the activation of channel by R-L3 (Salata et  
262 al., 1998). The putative binding site of R-L3 locates in the S5 and S6 transmembrane domains of the  
263 KCNQ1 protein (Seeböhm et al., 2003). It has been suggested that KCNE1 and R-L3 compete for this  
264 binding site which thus explains the effect of channel assembly on  $I_{Ks}$ . In contrast to the biphasic effect  
265 on the mammalian  $I_{Ks}$  current, R-L3 had only the inhibitory effect on zebrafish  $I_{Ks}$  channels. This effect  
266 was independent of the channel structure, as the currents produced by both KCNQ1 and  
267 KCNQ1+KCNE1 were reduced with the same drug affinity ( $IC_{50}$  about 1  $\mu$ M). Since S5 and S6 domains  
268 of zebrafish and mammalian KCNQ1 are practically identical (Hassinen et al., 2011; Abramochkin et al.,  
269 2018), the differences in  $I_{Ks}$  responses between mammalian and fish channels are unlikely to be due to  
270 the KCNQ1 protein. It is more likely that the zebrafish KCNE1 protein differs so much structurally from  
271 its mammalian counterpart that the interaction between KCNQ1 and KCNE1 is different in these  
272 vertebrate groups.

273 Mefenamic acid is an established activator of the mammalian  $I_{Ks}$  current at the concentration  
274 100  $\mu$ M (Busch et al., 1997; Abitbol et al., 1999; Unsöld et al., 2000; Toyoda et al., 2006). Still, at the  
275 concentration range of 0.001-300  $\mu$ M mefenamic acid inhibited the zebrafish  $I_{Ks}$ , although did not  
276 completely abolish it. Mefenamic acid acts extracellularly and causes an easily recognizable change in  
277 kinetics and amplitude of  $I_{Ks}$ . It changes the slowly activating and deactivating  $I_{Ks}$  into an almost linear  
278 current with instantaneous onset and slowed tail current decay (Abitbol et al., 1999; Toyoda et al.,  
279 2006; Wang et al. 2020b). No such changes were found in the zebrafish  $I_{Ks}$ . In mammalian  $I_{Ks}$ ,  
280 mefenamic acid is only effective on heteromeric channels comprising both KCNQ1 and KCNE1 subunits  
281 (Busch et al., 1997). Mefenamic acid's effect on mammalian  $I_{Ks}$  requires lysine-41 and a few other  
282 surrounding residues on the extra cellular surface of the KCNE1, which might explain why  
283 homotetrameric KCNQ1 channels are insensitive to this drug (Abitbol et al., 1999). Indeed, three  
284 residues lysine-41, leucine-42 and glutamic acid-43 seem to form the critical sequence in the  
285 mammalian KCNE1 for activation by mefenamic acid. Notably, in the zebrafish KCNE the residues in  
286 positions 41-43 are histidine, leucine and serine, respectively (Hassinen et al., 2011; Abramochkin et  
287 al., 2018). Therefore, it is likely that the interaction of KCNE1 with KCNQ1 is different from that of the  
288 mammalian  $I_{Ks}$  channel. Expression of the zebrafish KCNQ1 together with the mammalian KCNE1 would  
289 probably reveal the role zebrafish KCNE1 in the response of  $I_{Ks}$  to mefenamic acid and possibly to R-L3.

290

### 291 *Implications for the use of zebrafish as a preclinical drug screening model*

292 Cardiac AP is generated by the delicate interaction of several inward and outward ion currents of the  
293 sarcolemma. Under normal unstressed conditions, the role of  $I_{Ks}$  is probably minor in determining the  
294 shape of zebrafish cardiac AP (Abramochkin et al., 2018). Therefore, one might think that the atypical

295 responses of zebrafish  $I_{Ks}$  to drugs (exemplified by responses to R-L3 and mefenamic acid) do not  
296 necessarily indicate any severe limitation for drug screening. Because the atypical drug responses of  
297 zebrafish  $I_{Ks}$  may be due in part to a significantly different sequence of the KCNE1 subunit, particularly  
298 its interacting binding domain with KCNQ1, this problem could be easily eliminated by creating a  
299 transgenic zebrafish. The problem in this scenario is that the  $I_{Ks}$  channel is not likely to be the only ion  
300 channel that should be altered (Verkerk and Remme, 2012; Hassinen et al., 2015). Given the stringent  
301 criteria for drug screening (Wall and Shani, 2008), zebrafish may not be an optimal and safe general-  
302 purpose model for screening drug molecules for adult humans. The ion channel composition (e.g. large  
303 T-type  $Ca^{2+}$  current), myocyte structure (absence of T-tubuli) and management of intracellular free  $Ca^{2+}$   
304 concentration (less dependent on sarcoplasmic reticulum  $Ca^{2+}$  release) of the zebrafish heart is much  
305 more similar to neonatal than adult mammalian heart (Brette et al., 2008; Nemtsas et al., 2010;  
306 Verkerk and Remme, 2012; Bovo et al., 2013; Hassinen et al., 2015). Therefore, zebrafish might be a  
307 useful translational model for cardiac electrophysiology of fetal and neonatal individuals and possibly  
308 in addressing drug effects on fetal and neonatal human hearts (Vornanen et al., 2018).

309

#### 310 *Limitations of the study*

311 This is the first study to look at the effects of drugs on the zebrafish  $I_{Ks}$  and highlights some research  
312 topics that were not addressed in this study. Although the cardiac  $I_{Ks}$  is considered to be generated by  
313 channels that constitute of KCNQ1 and KCNE1 subunits, it is possible that that other KCNE subunits  
314 (KCNE2-5) will affect the phenotype of  $I_{Ks}$  current (Jespersen et al., 2005; Roura-Ferrer et al., 2010).  
315 Therefore, drug effects should be examined on APs of zebrafish heart in the presence of  $I_{Kr}$  blockers  
316 and under beta-adrenergic activation. Generating chimeras of zebrafish KCNQ1 and human KCNE1 or  
317 mutating the putative KCNQ1 binding domain in zebrafish KCNE1 could reveal the significance of  
318 zebrafish KCNE1 sequence in drug responses.

319

#### 320 **Acknowledgements**

321 Anita Kervinen is acknowledged for her excellent technical assistance.

322

#### 323 **Author contributions**

324 Conceptualization: M.V.; Methodology: J.H., M.H., M.V.; Investigation: J.H., M.H.; Writing – original  
325 draft: M.V.; Writing – review & editing: J.H., M.H., M.V.; Project administration: M.V.; Funding  
326 acquisition: M.V.

327

#### 328 **Funding**

329 This work was financed by a research grant from the Academy of Finland to M. Vornanen (project  
330 SA15051).

331

332 **Conflict of interest**

333 No conflicts of interest, financial or otherwise, are declared by the authors.

334

335

336

337 **Table 1.** Concentrations for half-maximal inhibition ( $IC_{50}$ ) of mammalian and zebrafish  $I_{Ks}$  current to  
 338 chromanol 293B and HMR-1556.

| Species and tissue                           | Chromanol<br>$IC_{50}$ ( $\mu$ M) | HMR-1556<br>$IC_{50}$ ( $\mu$ M) | Reference                |
|----------------------------------------------|-----------------------------------|----------------------------------|--------------------------|
| Human KCNQ1                                  | 26.9                              |                                  | (Lerche et al., 2007)    |
| Human KCNQ1/KCNE1                            | 6.9                               |                                  | (Lerche et al., 2007)    |
| Human KCNQ1                                  | 65.4                              |                                  | (Bett et al., 2006)      |
| Human KCNQ1/KCNE1                            | 15.1                              |                                  | (Bett et al., 2006)      |
| Guinea-pig ventricular myocytes ( $I_{Ks}$ ) | 2.1                               |                                  | (Busch, A. et al., 1996) |
| Guinea-pig KCNQ1/KCNE1                       | 6.51                              |                                  | (Printemps et al., 2019) |
| Guinea-pig ventricular myocytes ( $I_{Ks}$ ) | 3.17                              |                                  | (Fujisawa et al., 2000)  |
| Guinea-pig SA node cells ( $I_{Ks}$ )        | 5.3                               |                                  | (Ding et al., 2002)      |
| Dog ventricular myocytes ( $I_{Ks}$ )        | 1.8                               |                                  | (Sun et al., 2001)       |
| Mouse KCNQ1                                  | 40.9                              |                                  | (Busch et al., 1997)     |
| Mouse KCNQ1/KCNE1                            | 6.7                               |                                  | (Busch et al., 1997)     |
| Dog ventricular myocytes ( $I_{Ks}$ )        |                                   | 0.0105                           | (Thomas et al., 2003)    |
| Guinea-pig atrial myocytes ( $I_{Ks}$ )      |                                   | 0.061                            | (Bosch et al., 2003)     |
| Guinea-pig ventricular myocytes ( $I_{Ks}$ ) |                                   | 0.034                            | (Gerlach et al., 2001)   |
| Zebrafish KCNQ1                              | 13.1                              | 0.1                              | present study            |
| Zebrafish KCNQ1/KCNE1                        | 13.4                              | 1.5                              | present study            |

339 **FIGURE LEGENDS**

340

341 **FIGURE 1.** Current-voltage relationship of  $I_{Ks}$  generated by zebrafish KCNQ1 and KCNQ+KCNE1 channels  
342 in CHO cells. CHO cells were transfected either with KCNQ1 only (1:0) or with KCNQ1 and KCNE1 in 3:1  
343 plasmid ratio. (A) Representative recordings of currents generated by KCNQ1 channels (left) and  
344 voltage-dependence of activation kinetics (time-to-peak current) of  $I_{Ks}$  (right). (B) Representative  
345 recordings of currents generated by KCNQ1+KCNE1 channels (left) and voltage-dependence of  
346 activation kinetics ( $\tau$ ) of  $I_{Ks}$  (right). (C) Mean ( $\pm$  SEM) current-voltage relationship generated by KCNQ1  
347 and KCNQ1+KCNE1 channels, and cell transfected with GFT plasmid only. The voltage protocol used to  
348 elicit the delayed rectifier current is shown in the inset of the panel A. The results are means ( $\pm$  SEM)  
349 of 22 and 24 cells for KCNQ1 and KCNQ1+KCNE1, respectively. Asterisks indicate statistically significant  
350 differences ( $p < 0.05$ ) between the channel assemblies.

351

352 **FIGURE 2.** (A) Concentration-response curves of currents generated by zebrafish KCNQ1 and  
353 KCNQ+KCNE1 channels in CHO cells to chromanol 293B (left) and representative recordings of  $I_{Ks}$   
354 currents in the absence and presence of the drug (right). (B) Concentration-response curves of currents  
355 generated by zebrafish KCNQ1 and KCNQ+KCNE1 channels in CHO cells to HMR-1556 (left) and  
356 representative recordings of  $I_{Ks}$  currents in the absence and presence of the drug (right). The voltage  
357 protocol used to elicit the  $I_{Ks}$  peak current is shown in the inset of the panel A. Concentration for half-  
358 maximal inhibition of the current ( $IC_{50}$ ) is given within the figure. Asterisks indicate statistically  
359 differences ( $p < 0.05$ ) between the channel assemblies. The results are means ( $\pm$  SEM) of 12-14 cells.

360

361 **FIGURE 3.** (A) Concentration-response curves of currents generated by zebrafish KCNQ1 and  
362 KCNQ+KCNE1 channels in CHO cells to R-L3 (left) and representative recordings of  $I_{Ks}$  currents (right).  
363 (B) Concentration-response curves of currents generated by zebrafish KCNQ1 and KCNQ+KCNE1  
364 channels in CHO cells to mefenamic acid (left) and representative recordings of  $I_{Ks}$  currents (right). The  
365 voltage protocol used to elicit the  $I_{Ks}$  peak current is shown in the inset of the panel A. Concentration  
366 for half-maximal inhibition of the current ( $IC_{50}$ ) is given within the figure. Asterisks indicate statistically  
367 differences ( $p < 0.05$ ) between the channel assemblies. The results are means ( $\pm$  SEM) of 12-14 cells.

368

369

370 **FIGURE 1**

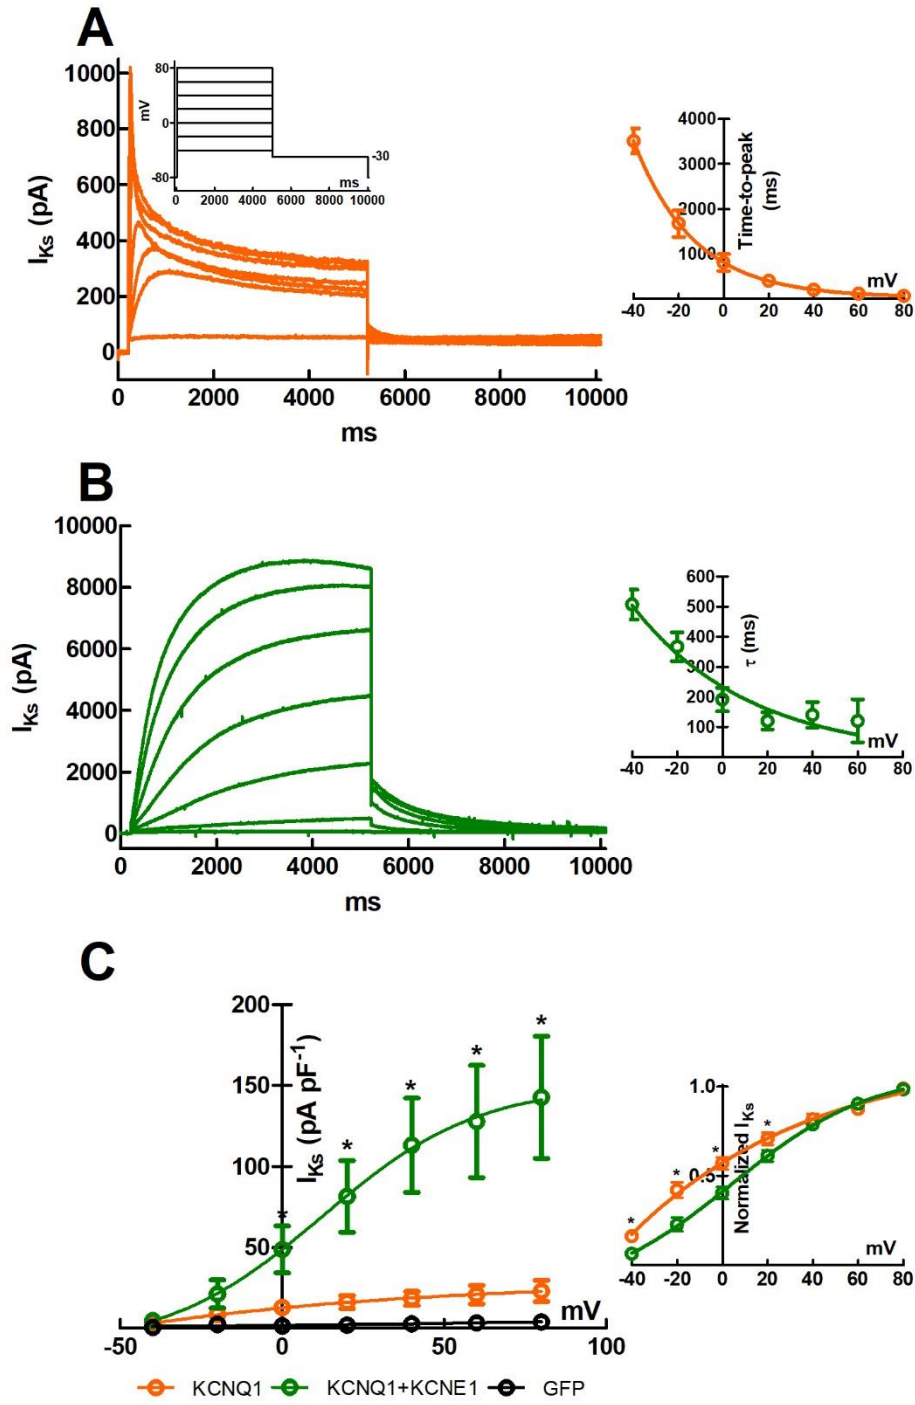

372

373

374 **FIGURE 2**

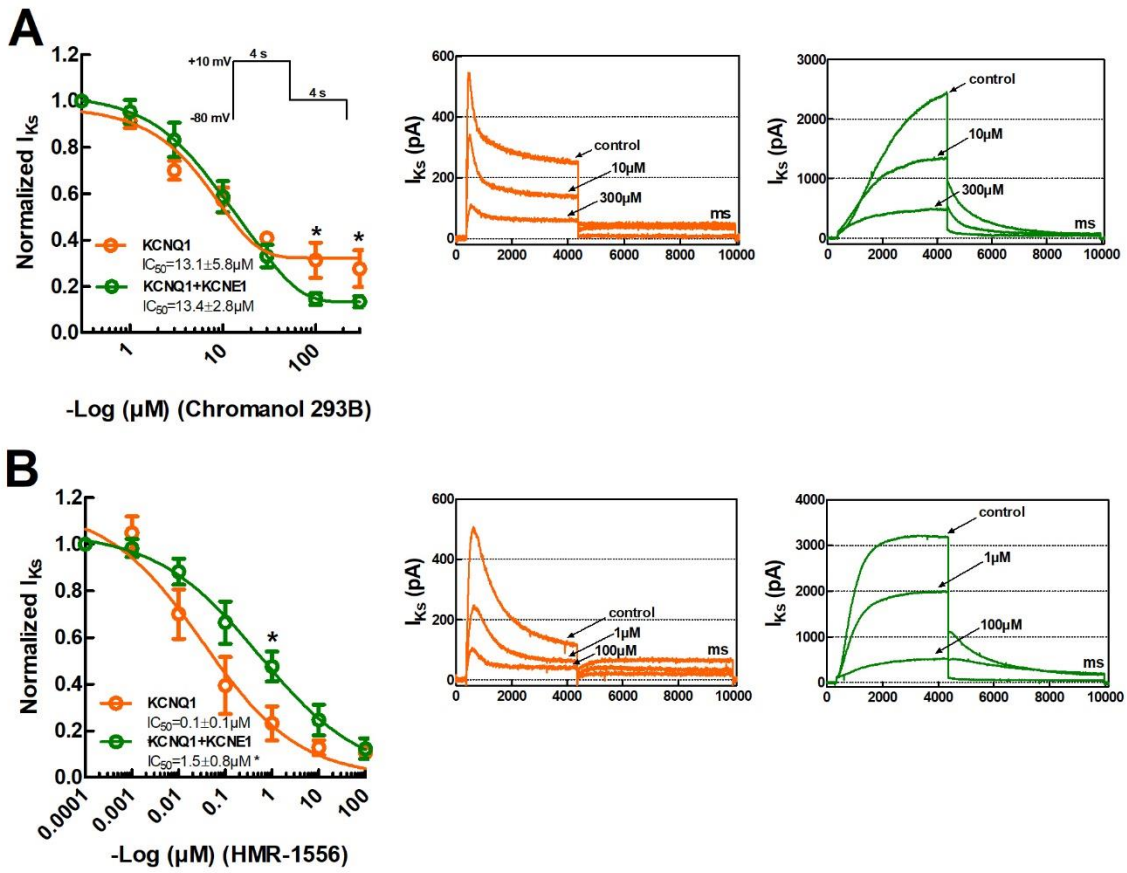

375

376

377

378

379

380

381

382

383

384

385

386

387

388

389 **FIGURE 3**

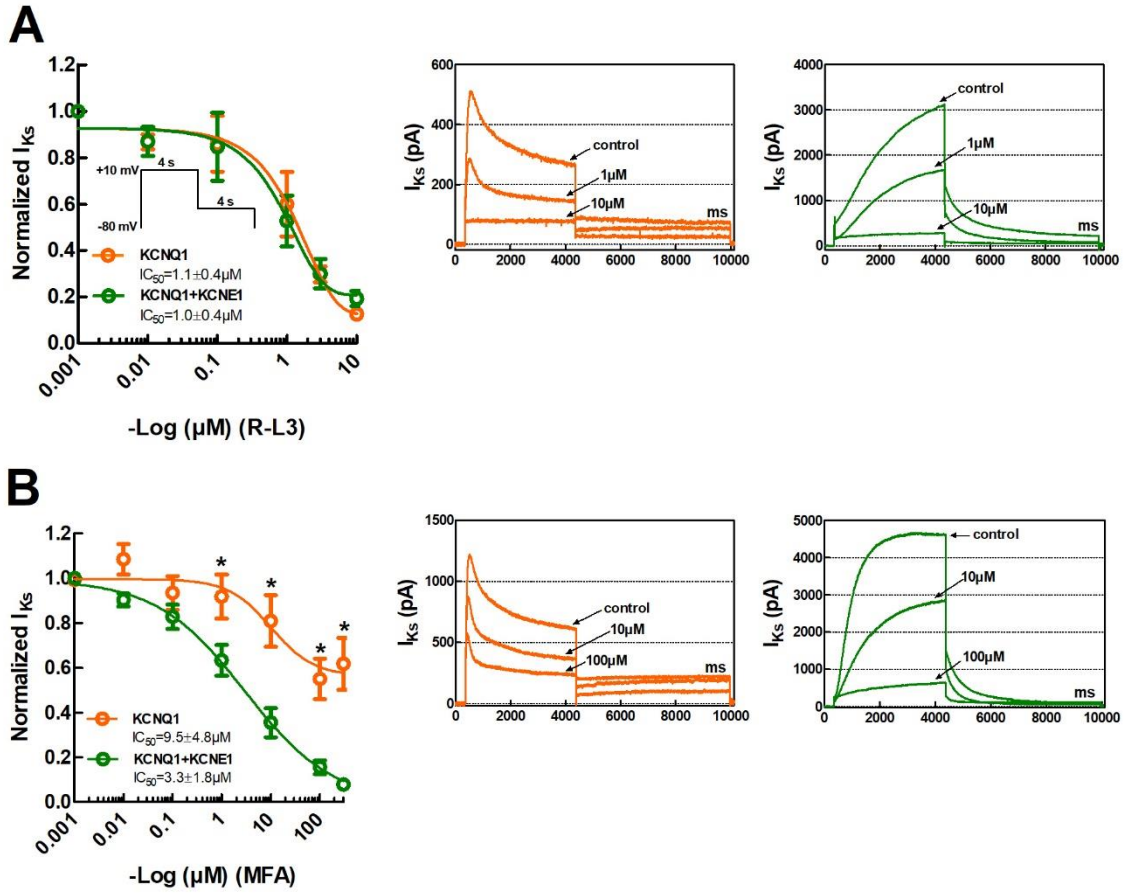

390

391

392

393

394

395

396

397

398

399



400 **References**

- 401 **Abitbol, I., Peretz, A., Lerche, C., Busch, A. E. and Attali, B.** (1999). Stilbenes and fenamates rescue  
402 the loss of IKS channel function induced by an LQT5 mutation and other IsK mutants. *EMBO J.* **18**,  
403 4137-4148
- 404 **Abramochkin, D. V., Hassinen, M. and Vornanen, M.** (2018). Transcripts of Kv7.1 and MinK channels  
405 and slow delayed rectifier K<sup>+</sup> current (I<sub>Ks</sub>) are expressed in zebrafish (*Danio rerio*) heart. *Pflug. Arch.*  
406 **470**, 1753-1764
- 407 **Barhanin, J., Lesage, F., Guillemare, E., Fink, M., Lazdunski, M. and Romey, G.** (1996). KvLQT1 and  
408 IsK (mink) proteins associate to form the I<sub>Ks</sub> cardiac potassium current. *Nature* **384**, 78-80
- 409 **Bendahhou, S., Marionneau, C., Hurogne, K., Larroque, M. M., Derand, R., Szuts, V., Escande, D.,**  
410 **Demolombe, S. and Barhanin, J.** (2005). In vitro molecular interactions and distribution of KCNE  
411 family with KCNQ1 in the human heart. *Cardiovascular Research* **67**, 529-538
- 412 **Bett, G. C. L., Morales, M. J., Beahm, D. L., Duffey, M. E. and Rasmusson, R. L.** (2006). Ancillary  
413 subunits and stimulation frequency determine the potency of chromanol 293B block of the KCNQ1  
414 potassium channel. *J. Physiol.* **576**, 755-767
- 415 **Bett, G. C. L. and Rasmusson, R. L.** (2008). Modification of K channel–drug interactions by ancillary  
416 subunits. *J. Physiol.* **586**, 929-950
- 417 **Bosch, R. F., Schneck, A. C., Csillag, S., Eigenberger, B., Gerlach, U., Brendel, J., Lang, H. J., Mewis,**  
418 **C., Gögelein, H. and Seipel, L.** (2003). Effects of the chromanol HMR 1556 on potassium currents in  
419 atrial myocytes. *Naunyn Schmiedebergs Arch. Pharmacol.* **367**, 281-288
- 420 **Bovo, E., Dvornikov, A. V., Mazurek, S. R., de Tombe, P. P. and Zima, A. V.** (2013). Mechanisms of  
421 Ca<sup>2+</sup> handling in zebrafish ventricular myocytes. *Pflügers Arch.* **465**, 1775-1784

- 422 **Brette, F., Luxan, G., Cros, C., Dixey, H., Wilson, C. and Shiels, H. A.** (2008). Characterization of  
423 isolated ventricular myocytes from adult zebrafish (*Danio rerio*). *Biochem. Biophys. Res. Commun.*  
424 **374**, 143-146
- 425 **Busch, A., Suessbrich, H., Waldegger, S., Sailer, E., Greger, R., Lang, H., Lang, F., Gibson, K. and**  
426 **Maylie, J.** (1996). Inhibition of  $I_{Ks}$  in guinea pig cardiac myocytes and guinea pig  $I_{Ks}$  channels by the  
427 chromanol 293B. *Pflügers Archiv* **432**, 1094-1096
- 428 **Busch, A. E., Busch, G. L., Ford, E., Suessbrich, H., Lang, H. J., Greger, R., Kunzelmann, K., Attali, B.**  
429 **and Sthmer, W.** (1997). The role of the  $I_{Ks}$  protein in the specific pharmacological properties of the  
430  $I_{Ks}$  channel complex. *Br. J. Pharmacol.* **122**, 187-189
- 431 **Chen, H., Kim, L. A., Rajan, S., Xu, S. and Goldstein, S. A. N.** (2003). Charybdotoxin binding in the  $I_{Ks}$   
432 pore demonstrates two Mink subunits in each channel complex. *Neuron* **40**, 15-23
- 433 **Corici, C., Kohajda, Z., Kristóf, A., Horváth, A., Virág, L., Szél, T., Nagy, N., Szakonyi, Z., Fülöp, F. and**  
434 **Muntean, D. M.** (2013). L-364,373 (R-L3) enantiomers have opposite modulating effects on  $I_{Ks}$  in  
435 mammalian ventricular myocytes. *Can. J. Physiol. Pharmacol.* **91**, 586-592
- 436 **de la Cruz, A., Perez-Rodriguez, M. E., Rainer, Q. C., Liin, S. I. and Larsson, P. H.** (2020). Zebrafish  
437 Heart as a Model for Early-Screening of Human Antiarrhythmic Drugs. *Biophys. J.* **118**, 114a
- 438 **Ding, W. G., Toyoda, F. and Matsuura, H.** (2002). Blocking action of chromanol 293B on the slow  
439 component of delayed rectifier K current in guinea-pig sino-atrial node cells. *Br. J. Pharmacol.* **137**,  
440 253-262
- 441 **Fujisawa, S., Ono, K. and Iijima, T.** (2000). Time-dependent block of the slowly activating delayed  
442 rectifier K current by chromanol 293B in guinea-pig ventricular cells. *Br. J. Pharmacol.* **129**, 1007-1013

- 443 **Gerlach, U., Brendel, J., Lang, H. J., Paulus, E. F., Weidmann, K., Brüggemann, A., Busch, A. E.,**  
444 **Suessbrich, H., Bleich, M. and Greger, R.** (2001). Synthesis and activity of novel and selective IKs-  
445 channel blockers. *J. Med. Chem.* **44**, 3831-3837
- 446 **Hassinen, M., Haverinen, J., Hardy, M. E., Shiels, H. A. and Vornanen, M.** (2015). Inward rectifier  
447 potassium current ( $I_{K1}$ ) and Kir2 composition of the zebrafish (*Danio rerio*) heart. *Pflüg. Arch.* **467**,  
448 2437-2446
- 449 **Hassinen, M., Laulaja, S., Paajanen, V., Haverinen, J. and Vornanen, M.** (2011). Thermal adaptation  
450 of the crucian carp (*Carassius carassius*) cardiac delayed rectifier current,  $I_{Ks}$ , by homomeric assembly  
451 of Kv7.1 subunits without MinK. *Am. J. Physiol.* **301**, R255-R2665
- 452 **Honek, J.** (2017). Preclinical research in drug development. *Med. Writing* **26**, 5-8
- 453 **Jespersen, T., Grunnet, M. and Olesen, S. P.** (2005). The KCNQ1 Potassium Channel: From Gene to  
454 Physiological Function. *Physiology* **20**, 408-416
- 455 **Jost, N., Virag, L., Bitay, M., Takacs, J., Lengyel, C., Biliczki, P., Nagy, Z., Bogats, G., Lathrop, D. A.,**  
456 **Papp, J. G. et al.** (2005). Restricting excessive cardiac action potential and QT prolongation: A vital  
457 role for  $I_{Ks}$  in human ventricular muscle. *Circulation* **112**, 1392-1399
- 458 **Joukar, S.** (2021). A comparative review on heart ion channels, action potentials and  
459 electrocardiogram in rodents and human: extrapolation of experimental insights to clinic. *Lab. Anim.*  
460 *Res.* **37**, 1-15
- 461 **Kari, G., Rodeck, U. and Dicker, A. P.** (2007). Zebrafish: an emerging model system for human  
462 disease and drug discovery. *Clin. Pharmacol. Ther.* **82**, 70-80
- 463 **Lerche, C., Bruhova, I., Lerche, H., Steinmeyer, K., Wei, A. D., Strutz-Seebohm, N., Lang, F., Busch,**  
464 **A. E., Zhorov, B. S. and Seebohm, G.** (2007). Chromanol 293B binding in KCNQ1 (Kv7.1) channels

- 465 involves electrostatic interactions with a potassium ion in the selectivity filter. *Mol. Pharmacol.* **71**,  
466 1503-1511
- 467 **MacRae, C. A. and Peterson, R. T.** (2015). Zebrafish as tools for drug discovery. *Nature Reviews Drug*  
468 *Discovery* **14**, 721-731
- 469 **Morin, T. J. and Kobertz, W. R.** (2008). Counting membrane-embedded KCNE beta-subunits in  
470 functioning K<sup>+</sup> channel complexes. *Proc. Natl. Acad. Sci. U. S. A.* **105**, 1478-1482
- 471 **Narumanchi, S., Wang, H., Perttunen, S., Tikkanen, I., Lakkisto, P. and Paavola, J.** (2021). Zebrafish  
472 Heart Failure Models. *Front. Cell Dev. Biol.* **9**, 1061
- 473 **Nemtsas, P., Wettwer, E., Christ, T., Weidinger, G. and Ravens, U.** (2010). Adult zebrafish heart as a  
474 model for human heart? An electrophysiological study. *J. Mol. Cell. Cardiol.* **48**, 161-171
- 475 **Parng, C., Seng, W. L., Semino, C. and McGrath, P.** (2002). Zebrafish: a preclinical model for drug  
476 screening. *Assay Drug. Dev. Techn.* **1**, 41-48
- 477 **Pound, P. and Ritskes-Hoitinga, M.** (2018). Is it possible to overcome issues of external validity in  
478 preclinical animal research? Why most animal models are bound to fail. *J. Transl. Med.* **16**, 1-8
- 479 **Printemps, R., Salvetat, C., Faivre, J. F., Le Grand, M., Bois, P. and ou Maati, H. M.** (2019). Role of  
480 Cardiac I<sub>Ks</sub> Current in Repolarization Reserve Process During Late Sodium Current (I<sub>NaL</sub>) Activation.  
481 *Cardiol. Cardio. Med.* **3**, 168-185
- 482 **Rocchetti, M., Besana, A., Gurrola, G. B., Possani, L. D. and Zaza, A.** (2001). Rate dependency of  
483 delayed rectifier currents during the guinea-pig ventricular action potential. *J. Physiol.* **534**, 721-732

- 484 **Roura-Ferrer, M., Solé, L., Oliveras, A., Dahan, R., Bielanska, J., Villarroel, Á, Comes, N. and Felipe,**  
485 **A.** (2010). Impact of KCNE subunits on KCNQ1 (Kv7. 1) channel membrane surface targeting. *J. Cell.*  
486 *Physiol.* **225**, 692-700
- 487 **Salata, J. J., Jurkiewicz, N. K., Wang, J., Evans, B. E., Orme, H. T. and Sanguinetti, M. C.** (1998). A  
488 novel benzodiazepine that activates cardiac slow delayed rectifier K<sup>+</sup> currents. *Mol. Pharmacol.* **54**,  
489 220-230
- 490 **Sanguinetti, M. C., Curran, M. E., Zou, A., Shen, J., Specter, P. S., Atkinson, D. L. and Keating, M. T.**  
491 (1996). Coassembly of KVLQT1 and minK (IsK) proteins to form cardiac I<sub>Ks</sub> potassium channel. *Nature*  
492 **384**, 80-83
- 493 **Seeböhm, G., Pusch, M., Chen, J. and Sanguinetti, M. C.** (2003). Pharmacological Activation of  
494 Normal and Arrhythmia-Associated Mutant KCNQ1 Potassium Channels. *Circulation Research* **93**,  
495 941-947
- 496 **Sun, Z. Q., Thomas, G. P. and Antzelevich, C.** (2001). Chromanol 293B inhibits slowly activating  
497 delayed rectifier and transient outward currents in canine left ventricular myocytes. *J. Cardiovasc.*  
498 *Electrophysiol.* **12**, 472-478
- 499 **Thomas, G. P., Gerlach, U. and Antzelevitch, C.** (2003). HMR 1556, a potent and selective blocker of  
500 slowly activating delayed rectifier potassium current. *J. Cardiovasc. Pharmacol.* **41**, 140-147
- 501 **Toyoda, F., Ueyama, H., Ding, W. G. and Matsuura, H.** (2006). Modulation of functional properties of  
502 KCNQ1 channel by association of KCNE1 and KCNE2. *Biochem. Biophys. Res. Commun.* **344**, 814-820
- 503 **Unsöld, B., Kerst, G., Brouzos, H., Hübner, M., Schreiber, R., Nitschke, R., Greger, R. and Bleich, M.**  
504 (2000). KCNE1 reverses the response of the human K<sup>+</sup> channel KCNQ1 to cytosolic pH changes and  
505 alters its pharmacology and sensitivity to temperature. *Pflügers Archiv* **441**, 368-378

- 506 **Verkerk, A. O. and Remme, C. A.** (2012). Zebrafish: a novel research tool for cardiac  
507 (patho)electrophysiology and ion channel disorders. *Front. Physiol.* **3**, 255
- 508 **Vornanen, M. and Hassinen, M.** (2016). Zebrafish heart as a model for human cardiac  
509 electrophysiology. *Channels* **10**, 101-110
- 510 **Vornanen, M., Haverinen, J. and Hassinen, M.** (2018). Excitation and excitation-contraction coupling  
511 of the zebrafish heart: implications for the zebrafish model in drug screening. In *Recent Advances in*  
512 *Zebrafish Researches* (ed. Y. Bozkurt), pp. 83-100
- 513 **Wall, R. J. and Shani, M.** (2008). Are animal models as good as we think? *Theriogenology* **69**, 2-9
- 514 **Wang, K., Terrenoire, C., Sampson, K. J., Iyer, V., Osteen, J. D., Lu, J., Keller, G., Kotton, D. N. and**  
515 **Kass, R. S.** (2011). Biophysical properties of slow potassium channels in human embryonic stem cell  
516 derived cardiomyocytes implicate subunit stoichiometry. *J. Physiol.* **589**, 6093-6104
- 517 **Wang, Y., Eldstrom, J. and Fedida, D.** (2020a). Gating and regulation of KCNQ1 and KCNQ1 KCNE1  
518 channel complexes. *Front. Physiol.* **11**, 504
- 519 **Wang, Y., Eldstrom, J. and Fedida, D.** (2020b). The I<sub>Ks</sub> Ion Channel Activator Mefenamic Acid Requires  
520 KCNE1 and Modulates Channel Gating in a Subunit-Dependent Manner. *Mol. Pharmacol.* **97**, 132-144
- 521 **Xu, H., Guo, W. and Nerbonne, J. M.** (1999). Four kinetically distinct depolarization-activated K<sup>+</sup>  
522 currents in adult mouse ventricular myocytes. *J. Gen. Physiol.* **113**, 661-677
- 523 **Xu, X., Salata, J. J., Wang, J., Wu, Y., Yan, G. X., Liu, T., Marinchak, R. A. and Kowey, P. R.** (2002).  
524 Increasing I<sub>Ks</sub> corrects abnormal repolarization in rabbit models of acquired LQT2 and ventricular  
525 hypertrophy. *Am. J. Physiol.* **283**, H664-H670
- 526
- 527
